# Supplementary material for: The Relationship between Inflammation Markers (CRP, IL-6, sCD40L) and Colorectal Cancer Stage, Grade, Size and Location
Source: MDPI journal article supplement (doi:10.3390/diagnostics11081382), 2021-07-31
Supplement: s1 [file s1]

**Table S1.** Concentration of inflammatory response biomarkers (CRP, IL-6, sCD40L) and cancer biomarkers (CEA, CA 19-9) in colorectal cancer patients (CRC) in relation to the control group and depending on clinicopathological characteristics of tumor. Q1 – 25th percentile, Q3 – 75th percentile.

|                           |                    | CRP [ng/ml]            |         | IL-6 [pg/ml]      |         | sCD40L [ng/ml]   |         | CEA [ng/ml]        |         | CA 19-9 [U/ml]      |         |
|---------------------------|--------------------|------------------------|---------|-------------------|---------|------------------|---------|--------------------|---------|---------------------|---------|
|                           |                    | Median (Q1-Q3)         | p-value | Median (Q1-Q3)    | p-value | Median (Q1-Q3)   | p-value | Median (Q1-Q3)     | p-value | Median (Q1-Q3)      | p-value |
| <b>Group tested</b>       | CRC                | 17.35 (6.19-33.20)     | <0.001* | 6.11 (3.12-15.42) | <0.001* | 1.77 (1.18-2.68) | <0.001* | 3.11 (1.52-10.02)  | <0.001* | 9.95 (4.50-15.00)   | 0.1113  |
|                           | Control            | 1.03 (0.56-1.88)       |         | 2.13 (1.37-2.56)  |         | 0.75 (0.48-0.93) |         | 0.99 (0.85-2.06)   |         | 6.18 (3.75-8.15)    |         |
| <b>TNM classification</b> | T1-4N0M0 (Group A) | 5.21 (3.85-17.02) @, # | <0.001* | 3.43 (3.11-7.72)  | 0.0944  | 1.25 (0.94-2.48) | 0.1045  | 2.59 (1.20-3.84) & | 0.0052* | 4.84 (2.41-8.74) \$ | 0.006*  |
|                           | T1-4N+M0 (Group B) | 27.35 (17.81-39.01)    |         | 9.27 (4.37-16.39) |         | 2.08 (1.50-3.84) |         | 3.08 (0.91-9.44)   |         | 11.60 (6.10-27.61)  |         |
|                           | T1-4N+M+ (Group C) | 46.44 (17.35-64.94)    |         | 8.83 (4.31-17.46) |         | 1.91 (1.58-2.23) |         | 31.50 (3.61-80.90) |         | 42.60 (11.90-67.30) |         |
| <b>Metastases</b>         | without metastases | 5.21 (3.85-17.02)      | <0.001* | 3.43 (3.11-7.72)  | 0.0290* | 1.25 (0.94-2.48) | 0.0590  | 2.59 (1.20-3.84)   | 0.0265* | 4.84 (2.41-8.74)    | <0.001* |
|                           | with metastases    | 29.6 (17.35-49.30)     |         | 9.16 (4.31-16.78) |         | 1.98 (1.54-2.81) |         | 4.41 (2.50-31.50)  |         | 12.89 (6.69-43.58)  |         |
| <b>Grade</b>              | Grade 1-2          | 17.19 (5.70-32.65)     | 0.5263  | 4.15 (3.11-10.99) | 0.0079* | 1.73 (1.15-2.52) | 0.5263  | 3.08 (1.41-10.60)  | 0.7951  | 9.80 (4.50-13.78)   | 0.8065  |
|                           | Grade 3            | 20.13 (7.78-62.47)     |         | 10.71 (6.94-29.0) |         | 1.81 (1.32-3.63) |         | 3.28 (2.52-9.44)   |         | 11.60 (4.88-27.61)  |         |

\* $p < 0.05$ , statistically significant

@ – statistically significant when compared to Group B in post hoc test,  $p < 0.001$

# – statistically significant when compared to Group C in post hoc test,  $p < 0.001$

& – statistically significant when compared to Group C in post hoc test,  $p = 0.0041$

\$ – statistically significant when compared to Group C in post hoc test,  $p < 0.001$
